# Supplementary material
Source: HighWire-hosted journal article supplement (http://dmd.aspetjournals.org/highwire/filestream/65735/field_highwire_adjunct_files/0/Supplemental_Data_1.pdf)
Supplement: Supplemental_Data_1.pdf [file Supplemental_Data_1.pdf]

## Supplemental Data 1

Verònica Ventura, Josep Solà, Carles Celma, Concepción Peraire and Rosendo Obach.

*In Vitro* Metabolism of Irosustat, a Novel Steroid Sulphatase Inhibitor: Inter-Species Comparison, Metabolite Identification and Metabolic Enzyme Identification.

*Drug Metabolism and Disposition* (DMD #38315)

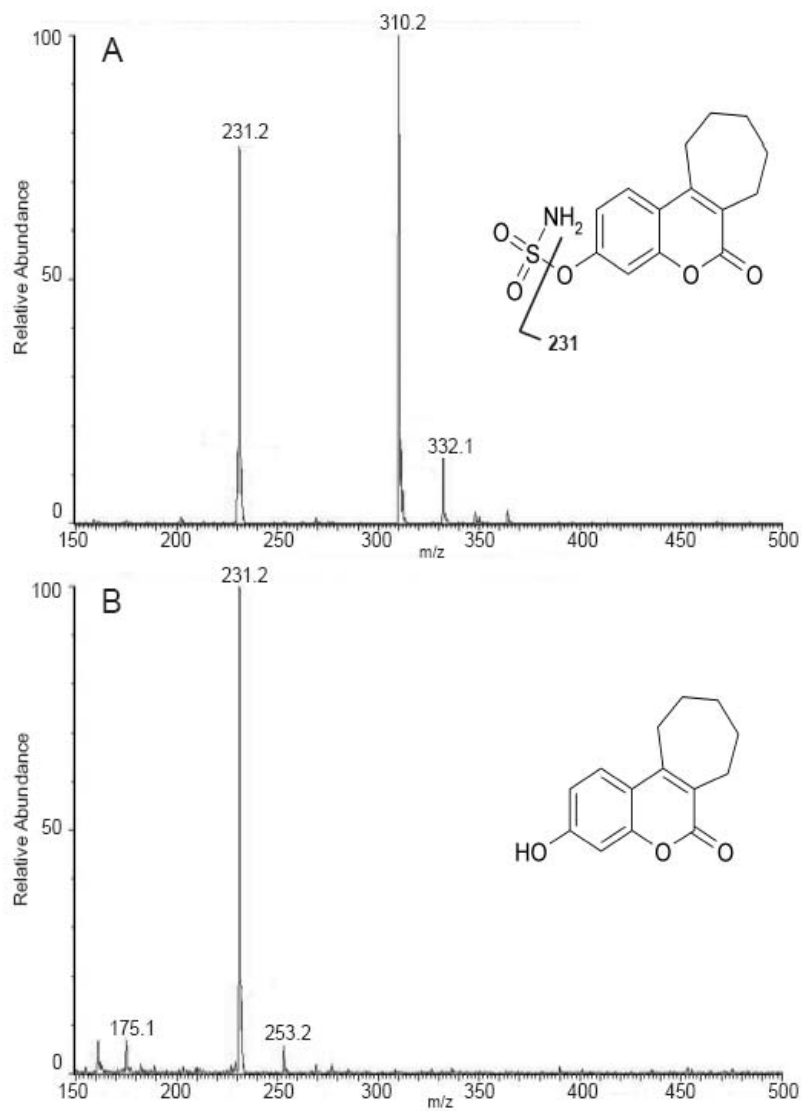

**Fig. 1.** MS Spectra (ESI positive ion mode) of Irosustat (A) and 667-Coumarin (B) at 60 V cone voltage.

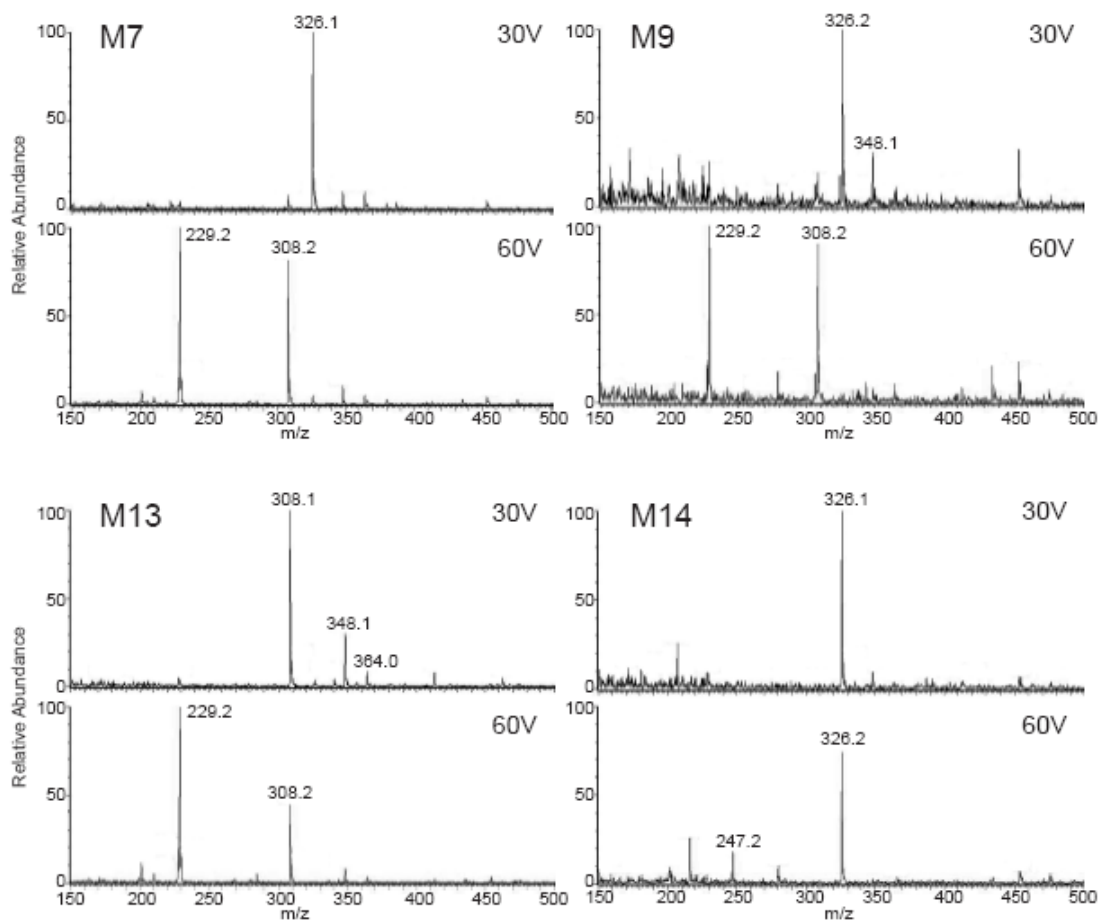

**Fig. 2.** MS Spectra (ESI positive ion mode) of the mono-oxidized metabolites of Irosustat: M7, M9, M13 and M14. Upper panel: MS spectra obtained at 30 V cone voltage; Lower panel: MS spectra obtained at 60 V cone voltage. M7, M9 and M14 showed a protonated molecular ion of  $m/z$  326, representing an increase of 16 mass units in its parent compound Irosustat. Although M13 showed a protonated molecular ion of  $m/z$  308, the formation of ions showing  $m/z$  consistent with the  $\text{Na}^+$  and  $\text{K}^+$  adducts of  $m/z$  326, suggested that M13 was also a mono-oxidized metabolite of Irosustat, and that probably was dehydrated in the MS source (consequently losing 18 mass units).

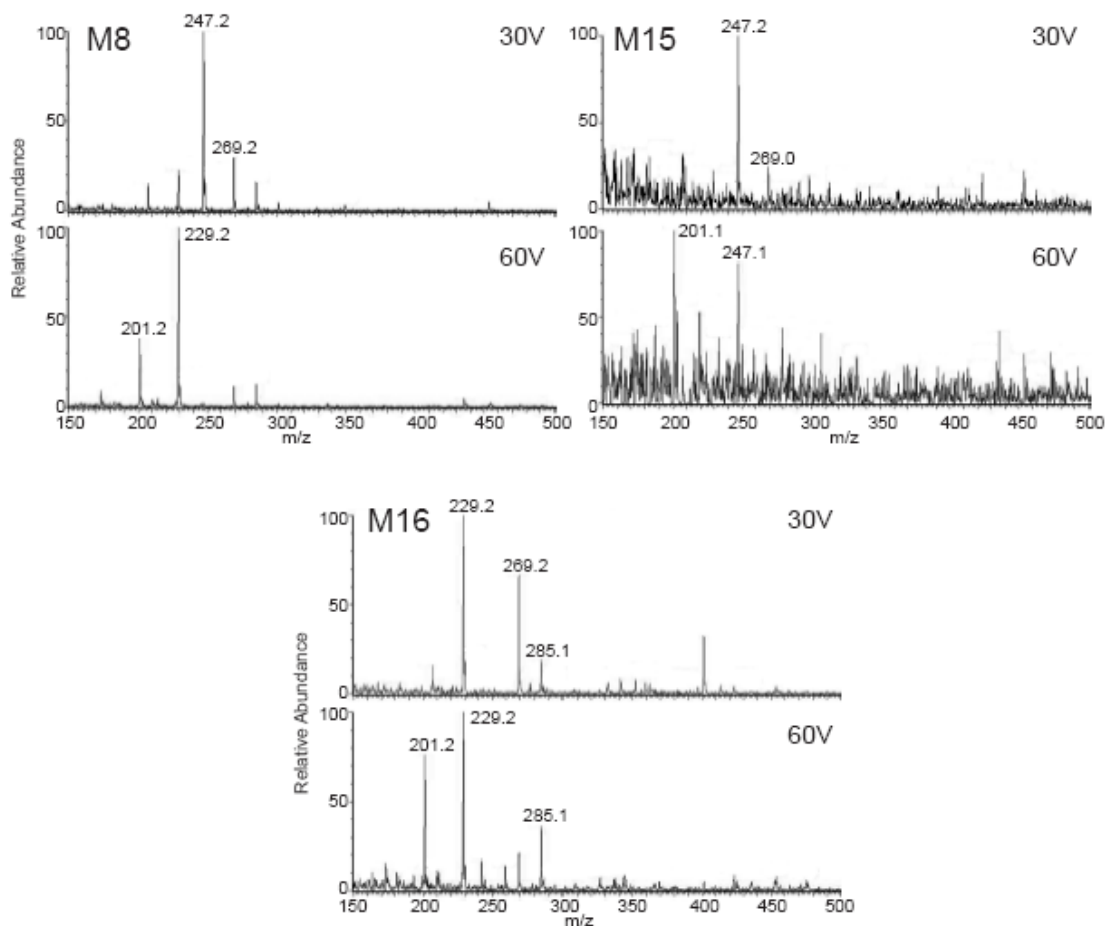

**Fig. 3.** MS Spectra (ESI positive ion mode) of the mono-oxidized metabolites of 667-Coumarin: M8, M15 and M16. Upper panel: MS spectra obtained at 30 V cone voltage; Lower panel: MS spectra obtained at 60 V cone voltage. M8 and M15 showed a protonated molecular ion of  $m/z$  247, representing an increase of 16 mass units in its parent compound 667-Coumarin. Although M16 showed a protonated molecular ion of  $m/z$  229, the formation of ions showing  $m/z$  consistent with the  $\text{Na}^+$  and  $\text{K}^+$  adducts of  $m/z$  247, suggested that M16 was also a mono-oxidized metabolite of 667-Coumarin, and that probably was dehydrated in the MS source (consequently losing 18 mass units).

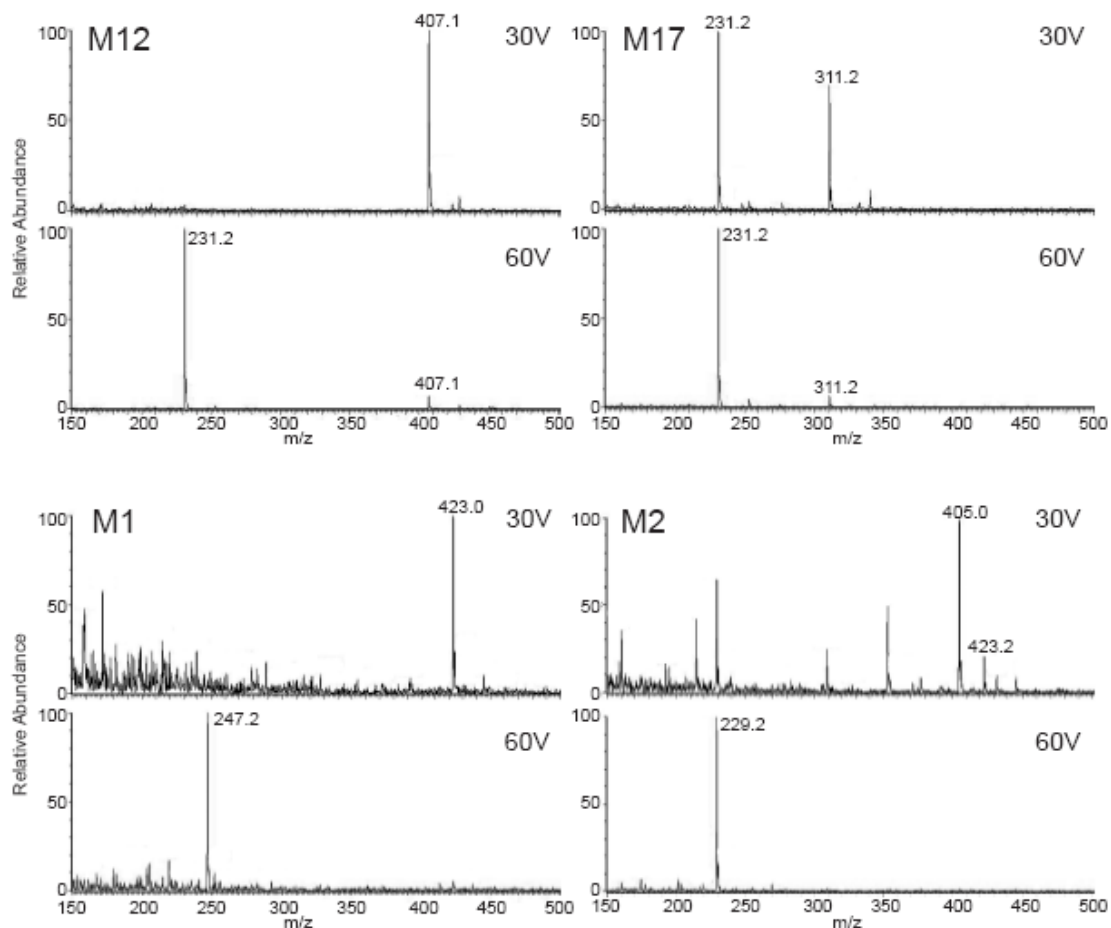

**Fig. 4.** MS Spectra (ESI positive ion mode) of the 667-Coumarin glucuronide: M12; the 667-Coumarin sulphate: M17; and two glucuronides of mono-oxidized 667-Coumarin metabolites: M1 (glucuronide of metabolite M11), and M2 (glucuronide of metabolite M16). Upper panel: MS spectra obtained at 30 V cone voltage; Lower panel: MS spectra obtained at 60 V cone voltage. At the cone voltage of 60 V, M1 showed a fragmentation product of  $m/z$  247 corresponding to the mono-oxidized 667-Coumarin residue after the neutral loss of the glucuronide, whereas M2 showed a fragmentation product of  $m/z$  229 corresponding to a typical fragmentation product of some mono-oxidized 667-Coumarin derivatives. Metabolites M12 and M17 showed a fragmentation product of  $m/z$  231 corresponding to the  $m/z$  of 667-Coumarin residue after the neutral loss of the glucuronide or the sulphate, respectively.
